# Supplementary material for: Investigation on Antibiotic-Resistance, Biofilm Formation and Virulence Factors in Multi Drug Resistant and Non Multi Drug Resistant Staphylococcus pseudintermedius
Source: MDPI journal article supplement (doi:10.3390/microorganisms7120702), 2019-12-16
Supplement: s1 [file s1]

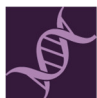

**Supplementary Table 1.** Phenotypic and genetic determination of biofilm-forming ability.

| non MDR strains |                      |          | MDR strains |                      |          |
|-----------------|----------------------|----------|-------------|----------------------|----------|
| ID              | PCR <i>icaA/icaD</i> | MtP      | ID          | PCR <i>icaA/icaD</i> | MtP      |
| 3               | +/+                  | Weak     | 4           | +/+                  | Moderate |
| 6A              | +/+                  | Weak     | 12          | +/+                  | Strong   |
| 7B1             | +/+                  | Moderate | 14          | +/+                  | Strong   |
| 8               | +/+                  | Moderate | 27          | +/+                  | Weak     |
| 10A             | +/+                  | Weak     | 28A         | +/+                  | Strong   |
| 11B             | +/+                  | Weak     | 28B         | +/+                  | Strong   |
| 13              | +/+                  | Weak     | 238         | +/+                  | Moderate |
| 16              | +/+                  | Moderate | 34          | +/+                  | Moderate |
| 18A             | +/+                  | Weak     | 35          | +/+                  | Strong   |
| 19A             | +/+                  | Moderate | 36          | +/+                  | Strong   |
| 20              | +/+                  | Weak     | 37          | +/+                  | Strong   |
| 23              | +/+                  | Weak     | 39          | +/+                  | Strong   |
| 26A             | +/+                  | Absent   | 41          | +/+                  | Strong   |
| 30B             | +/+                  | Moderate | 42          | +/+                  | Strong   |
| 31              | -/-                  | Moderate | 45          | +/+                  | Strong   |
| 48              | +/+                  | Weak     | 46          | -/+                  | Strong   |
| 51              | +/+                  | Weak     | 54          | +/+                  | Strong   |
| 53              | +/+                  | Weak     | 56          | +/+                  | Strong   |
| 55              | +/+                  | Weak     | 58          | +/+                  | Moderate |
| 59              | +/+                  | Weak     | 60          | +/+                  | Moderate |
| 61              | +/+                  | Weak     | 62          | +/+                  | Strong   |
| 70              | +/+                  | Absent   | 63          | -/+                  | Moderate |
| 74              | +/+                  | Weak     | 64          | -/+                  | Strong   |
| 79              | +/+                  | Moderate | 66          | -/+                  | Moderate |
| 84              | +/+                  | Moderate | 67          | +/+                  | Moderate |
| 85              | +/+                  | Weak     | 71          | +/+                  | Moderate |
| 91              | +/+                  | Moderate | 72          | -/+                  | Strong   |
| 96              | +/+                  | Absent   | 76          | +/+                  | Moderate |
| 98              | +/+                  | Strong   | 77          | -/+                  | Moderate |
| 234             | +/+                  | Weak     | 78          | -/+                  | Moderate |
| 502             | +/+                  | Absent   | 81          | -/+                  | Moderate |
|                 |                      |          | 82          | +/+                  | Moderate |
|                 |                      |          | 87          | -/+                  | Moderate |
|                 |                      |          | 89          | -/+                  | Moderate |
|                 |                      |          | 93          | +/+                  | Weak     |
|                 |                      |          | 94          | -/-                  | Strong   |
|                 |                      |          | 99          | -/+                  | Strong   |
|                 |                      |          | 102         | -/+                  | Moderate |
|                 |                      |          | 104         | -/+                  | Moderate |
|                 |                      |          | 105         | +/+                  | Moderate |
|                 |                      |          | 107         | +/+                  | Moderate |
|                 |                      |          | 117         | +/+                  | Strong   |
